# Supplementary material
Source: PubMed Central journal article supplement (PMC9270953)
Supplement: joces-135-259560-s1.pdf [file joces-135-259560-s1.pdf]

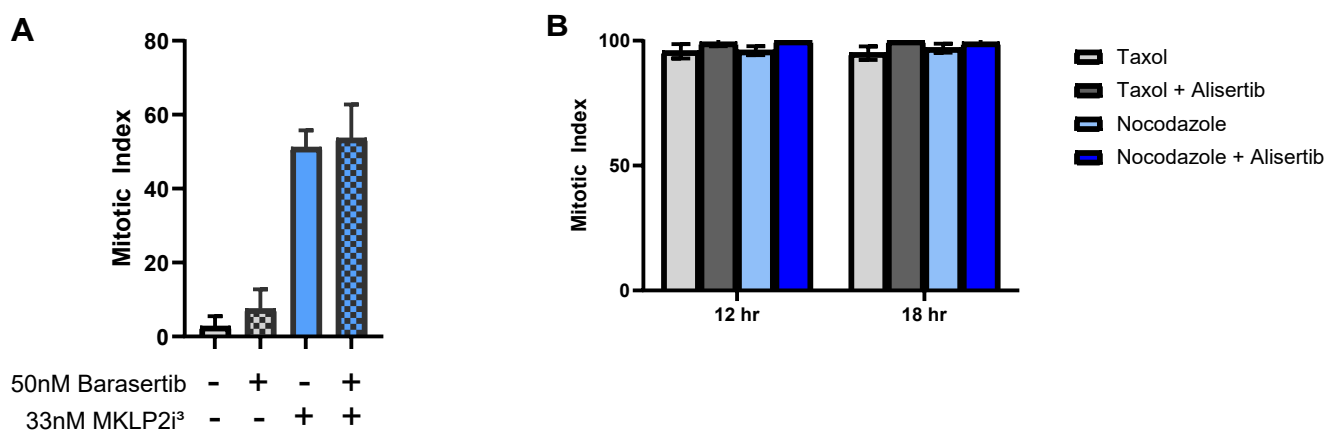

**Fig. S1.** A) Graph depicting mitotic index of HeLa cells 18 hrs after release from DTB then treated with DMSO, 50nM barasertib, 33nM MKLP2i<sup>3</sup> or a combination (n= 100 cells, 3 independent experiments). B) Graph depicting mitotic index of HeLa cells 12 and 18 hrs after release from DTB into 100nM taxol, 100ng/μl nocodazole, 12.5nM alisertib, or a combination (n=100 cells).

**Table S1. KEY RESOURCES TABLE**

| REAGENT or RESOURCE                                         | SOURCE                                  | IDENTIFIER                          |
|-------------------------------------------------------------|-----------------------------------------|-------------------------------------|
| <b>Antibodies</b>                                           |                                         |                                     |
| Centromere protein antibody (CREST)                         | Antibodies Inc                          | Cat# 15-234<br>RRID:AB_2687472      |
| γ-tubulin antibody                                          | Millipore-Sigma                         | Cat# T5326<br>RRID:AB_532292        |
| Tubulin antibody [YL1/2]                                    | Thermo Fisher Scientific                | Cat# MA1-80017<br>RRID: AB_2210201  |
| Hec1 (phospho Ser55) antibody                               | GeneTex                                 | Cat# GTX70017<br>RRID:AB_11162004   |
| Hec1 antibody [9G3.23]                                      | GeneTex                                 | Cat# GTX70268<br>RRID:AB_371632     |
| Phospho-Aurora A (Thr288) (C39D8)                           | Cell Signaling                          | Cat# 3079S<br>RRID:AB_2061481       |
| Mouse Anti-IAK1 (Aurora A)                                  | BD Biosciences                          | Cat# 610939<br>RRID:AB_398252       |
| Phospho Aurora Kinase B (Thr232) Polyclonal antibody        | Thermo Fisher Scientific                | Cat# 600-401-677<br>RRID:AB_2061641 |
| β-ACTIN                                                     | Millipore-Sigma                         | Cat# A3854,<br>RRID:AB_262011       |
| IRDye® 800CW Donkey anti-Mouse IgG Secondary Antibody       | LI-COR Biosciences                      | Cat# 926-32212<br>RRID:AB_621847    |
| IRDye® 800CW Donkey anti-Rabbit IgG Secondary Antibody      | LI-COR Biosciences                      | Cat# 926-32213<br>RRID:AB_621848    |
| Goat anti-rat secondary antibody, Alexa Fluor 546           | Invitrogen                              | Cat# A-11081                        |
| Goat anti-mouse secondary antibody, Alexa Fluor 488         | Invitrogen                              | Cat# A-32723                        |
| Donkey anti-rat secondary antibody, Alexa Fluor 488         | Invitrogen                              | Cat# A-21208                        |
| Goat anti-mouse secondary antibody, Alexa Fluor 546         | Invitrogen                              | Cat# A-11030                        |
| Donkey anti-rabbit secondary antibody, Alexa Fluor Plus 488 | Invitrogen                              | Cat# A-32790                        |
| Goat anti-rabbit secondary antibody, Alexa Fluor 594        | Invitrogen                              | Cat# A-11012                        |
| Goat anti-human secondary antibody, Alexa Fluor 488         | Invitrogen                              | Cat# A-11013                        |
| <b>Chemicals, peptides, and recombinant proteins</b>        |                                         |                                     |
| Paprotain (MKLP2 <sup>1</sup> )                             | Tocris                                  | Cat# 4813                           |
| Compound 9a (MKLP2 <sup>2</sup> )                           | OSU Medicinal Chemistry Shared Resource | (Labrière et al., 2016)             |
| Compound 38 (MKLP2 <sup>3</sup> )                           | Wuxi AppTec                             | (Pouletty, 2019)                    |
| Lipofectamine RNAiMAX                                       | Thermo Fisher Scientific                | Cat# 13778150                       |
| Thymidine                                                   | Millipore-Sigma                         | Cat# T1895                          |
| TransIT-LT1 Reagent                                         | Mirus Bio                               | Cat# MIR 2304                       |
| RO-3306                                                     | Selleckchem                             | Cat# S7747                          |
| Alisertib                                                   | Selleckchem                             | Cat# S1133                          |
| Barasertib                                                  | Selleckchem                             | Cat# S1147                          |
| ProLong Gold Antifade Mountant with NucBlue Stain           | ThermoFisher                            | Cat# P36981                         |

|                                                       |                        |                                                                         |
|-------------------------------------------------------|------------------------|-------------------------------------------------------------------------|
| Fluoromount-G                                         | ThermoFisher           | Cat# 00-4958-02                                                         |
| <b>Critical commercial assays</b>                     |                        |                                                                         |
| Aquarius Enumeration Probes (Chr 15)                  | Oxford Gene Technology | Cat# LPE015R-A                                                          |
| Aquarius Enumeration Probes (Chr 2)                   | Oxford Gene Technology | Cat# LPE002G-A                                                          |
| Aquarius Enumeration Probes (Chr 10)                  | Oxford Gene Technology | Cat# LPE010G-A                                                          |
| Aquarius Enumeration Probes (Chr 7)                   | Oxford Gene Technology | Cat# LPE007R-A                                                          |
| <b>Experimental models: Cell lines</b>                |                        |                                                                         |
| HeLa                                                  | ATCC                   | CRM-CCL-2                                                               |
| HeLa mCherry H2B GFP tubulin                          | Katharine Ullman       | n/a                                                                     |
| <b>Oligonucleotides</b>                               |                        |                                                                         |
| G165E F-ACTAACTCAGaGAAAACCCAC                         | IDT                    | n/a                                                                     |
| G165E R-GACTCCATATGTATAGATGAG                         | IDT                    | n/a                                                                     |
| E413A F-GCTGGCTCAGcGCGCTGCAAA                         | IDT                    | n/a                                                                     |
| E413A R-CAGATCACAGGGTGACAGCTCG                        | IDT                    | n/a                                                                     |
| ON-TARGETplus Non-Targeting Pool                      | Horizon Discovery      | D-001810-10-05                                                          |
| ON-TARGETplus KIF20A siRNA 3'UTR                      | Horizon Discovery      | J-004957-06                                                             |
| ON-TARGETplus KIF20A siRNA 3'UTR                      | Horizon Discovery      | J-004957-07                                                             |
| ON-TARGETplus KIF20A siRNA                            | Horizon Discovery      | J-004957-08                                                             |
| ON-TARGETplus KIF20A siRNA 3'UTR                      | Horizon Discovery      | J-004957-09                                                             |
| ON-TARGETplus KIF20A 3'UTR<br>CCACCUAUGUAAUCUCAUGdTdT | Horizon Discovery      | (Adriaans et al., 2020)                                                 |
| <b>Recombinant DNA</b>                                |                        |                                                                         |
| pCS2-TAP MKLP2                                        | This Study             | n/a                                                                     |
| pCS2-TAP MKLP2 G165E                                  | This Study             | n/a                                                                     |
| pCS2-TAP MKLP2 E413A                                  | This Study             | n/a                                                                     |
| <b>Software and algorithms</b>                        |                        |                                                                         |
| FIJI                                                  |                        | <a href="https://imagej.net/Fiji">https://imagej.net/Fiji</a>           |
| Prism 9                                               | GraphPad               | <a href="https://www.graphpad.com">https://www.graphpad.com</a>         |
| Incucyte ZOOM 2016B                                   | Sartorius              | <a href="https://www.sartorius.com/en">https://www.sartorius.com/en</a> |

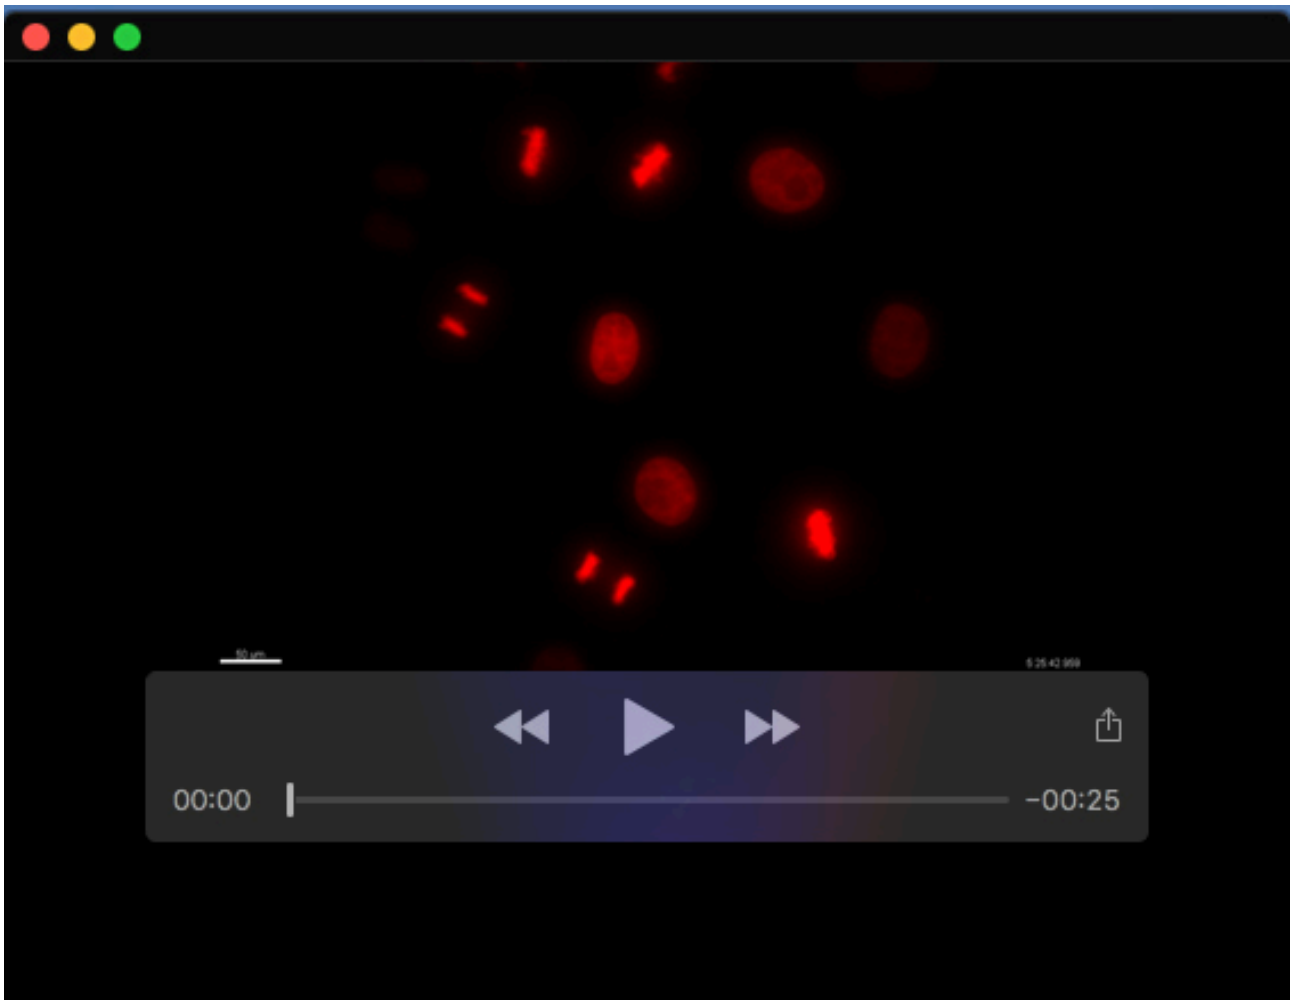

**Movie 1.** Epifluorescent images taken every 5 minutes of HeLa mCherry H2B GFP tubulin cells after DTB and treated with DMSO. Images were compiled into a time-lapse movie of SME projections.

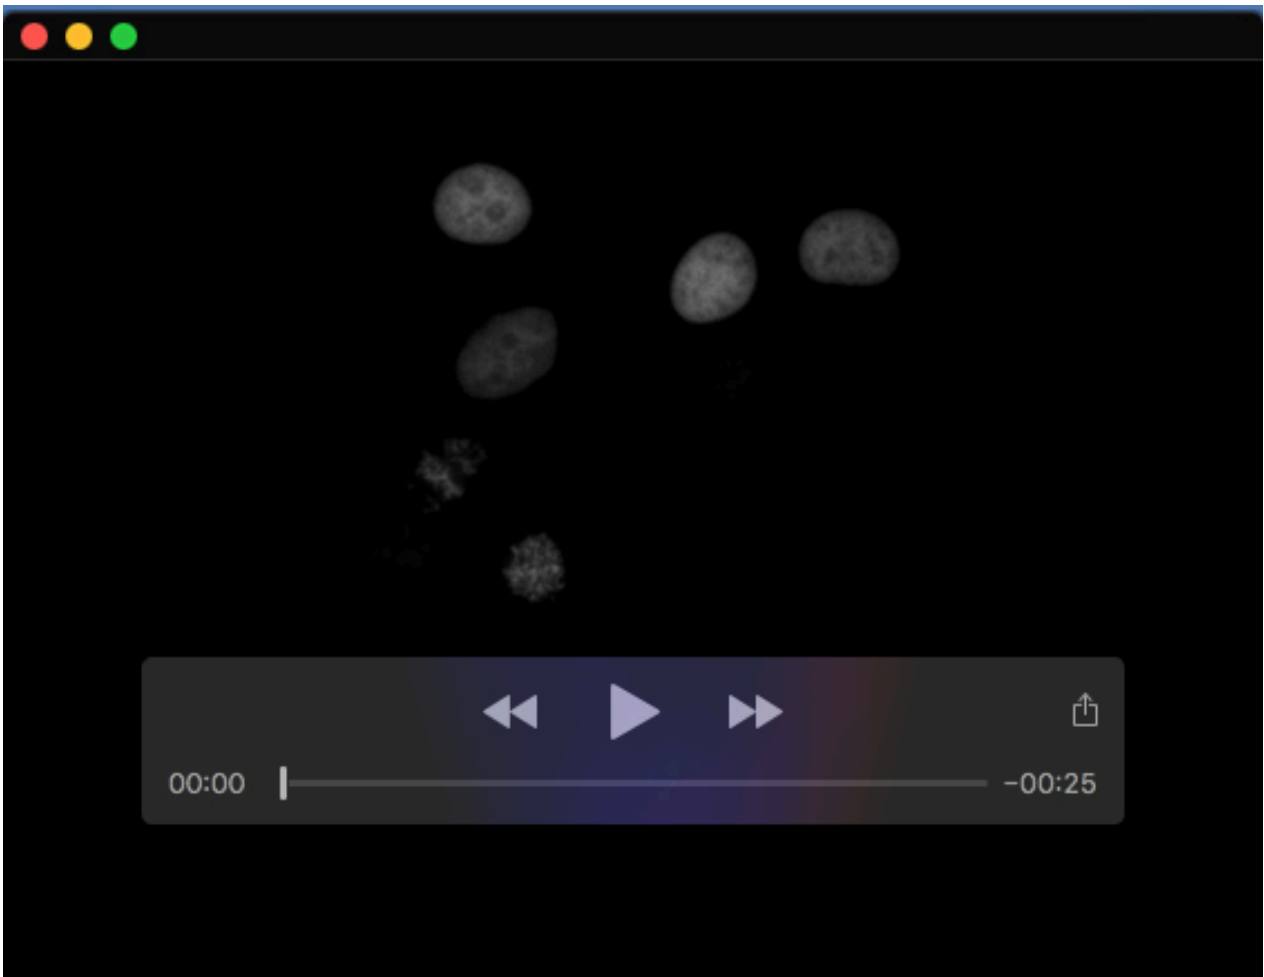

**Movie 2.** Epifluorescent images taken every 5 minutes of HeLa mCherry H2B GFP tubulin cells after DTB and treated with 33nM MKLP2i<sup>3</sup>. Images were compiled into a time-lapse movie of SME projections.

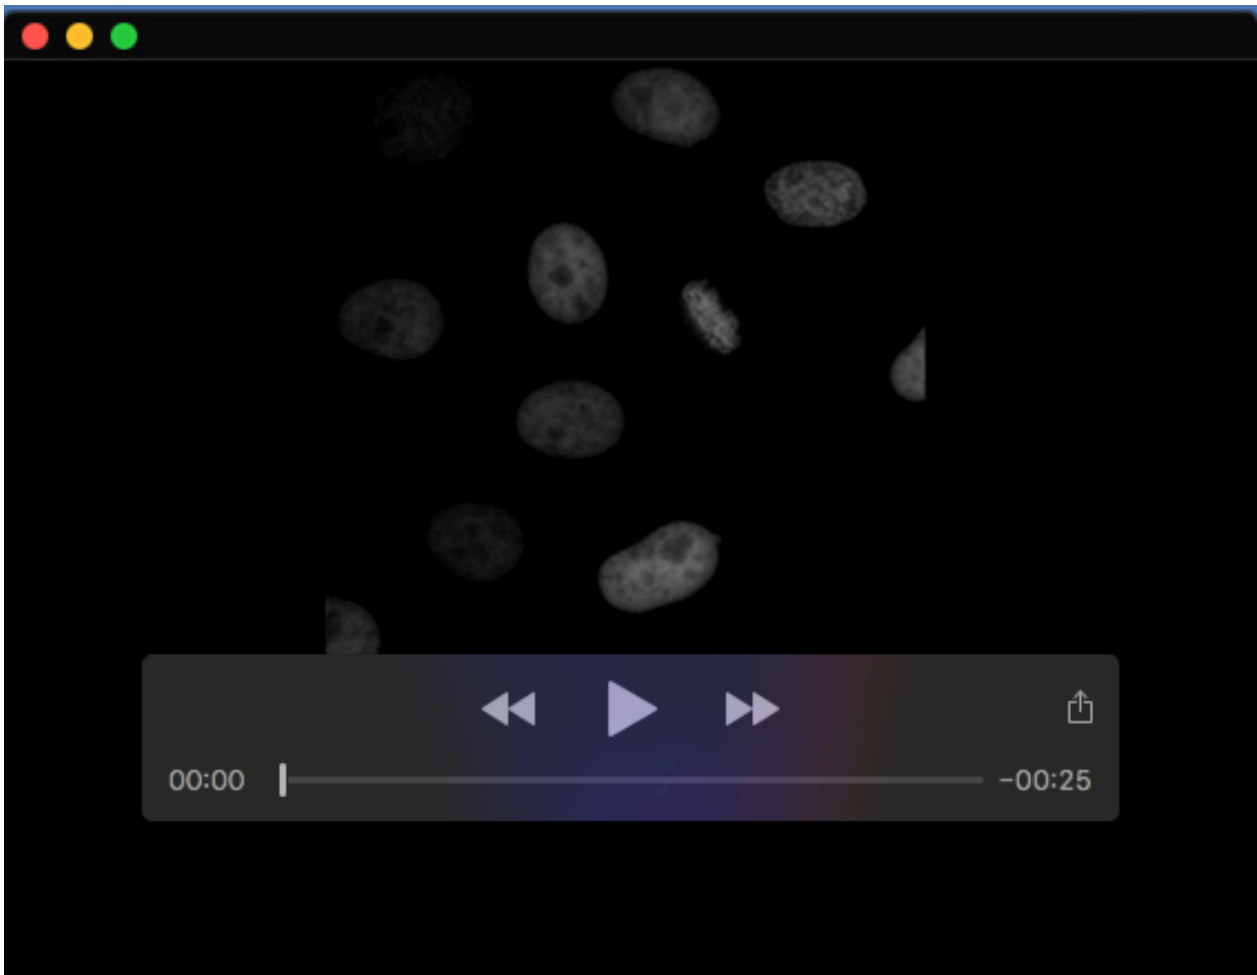

**Movie 3.** Epifluorescent images taken every 5 minutes of HeLa mCherry H2B GFP tubulin cells after DTB and treated with 3.7nM MKLP2i<sup>3</sup>. Images were compiled into a time-lapse movie of SME projections.

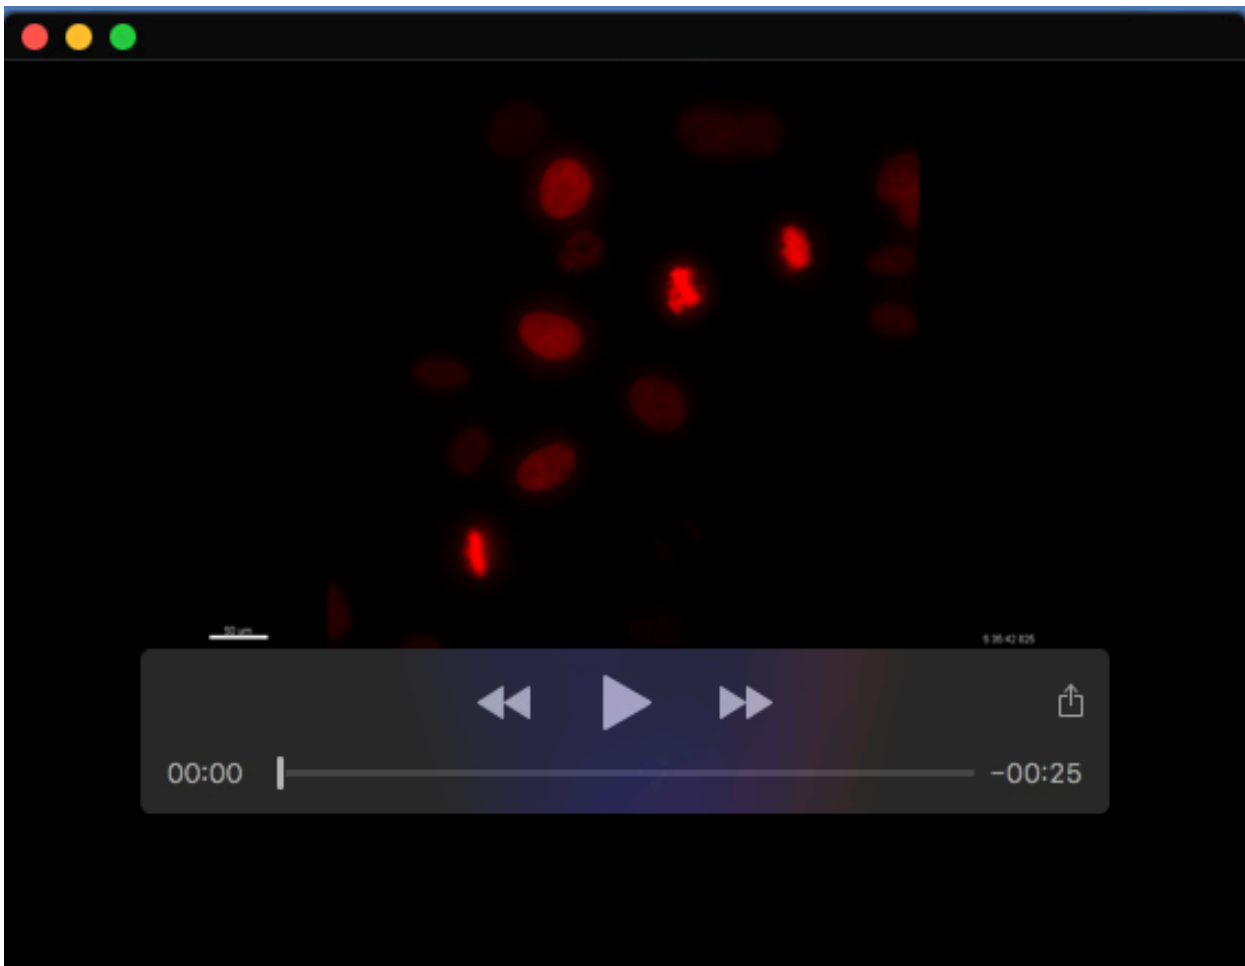

**Movie 4.** Epifluorescent images taken every 5 minutes of HeLa mCherry H2B GFP tubulin cells after DTB and transfected with siMKLP2 + pCS2 TAP KIF20A. Images were compiled into a time-lapse movie of SME projections.

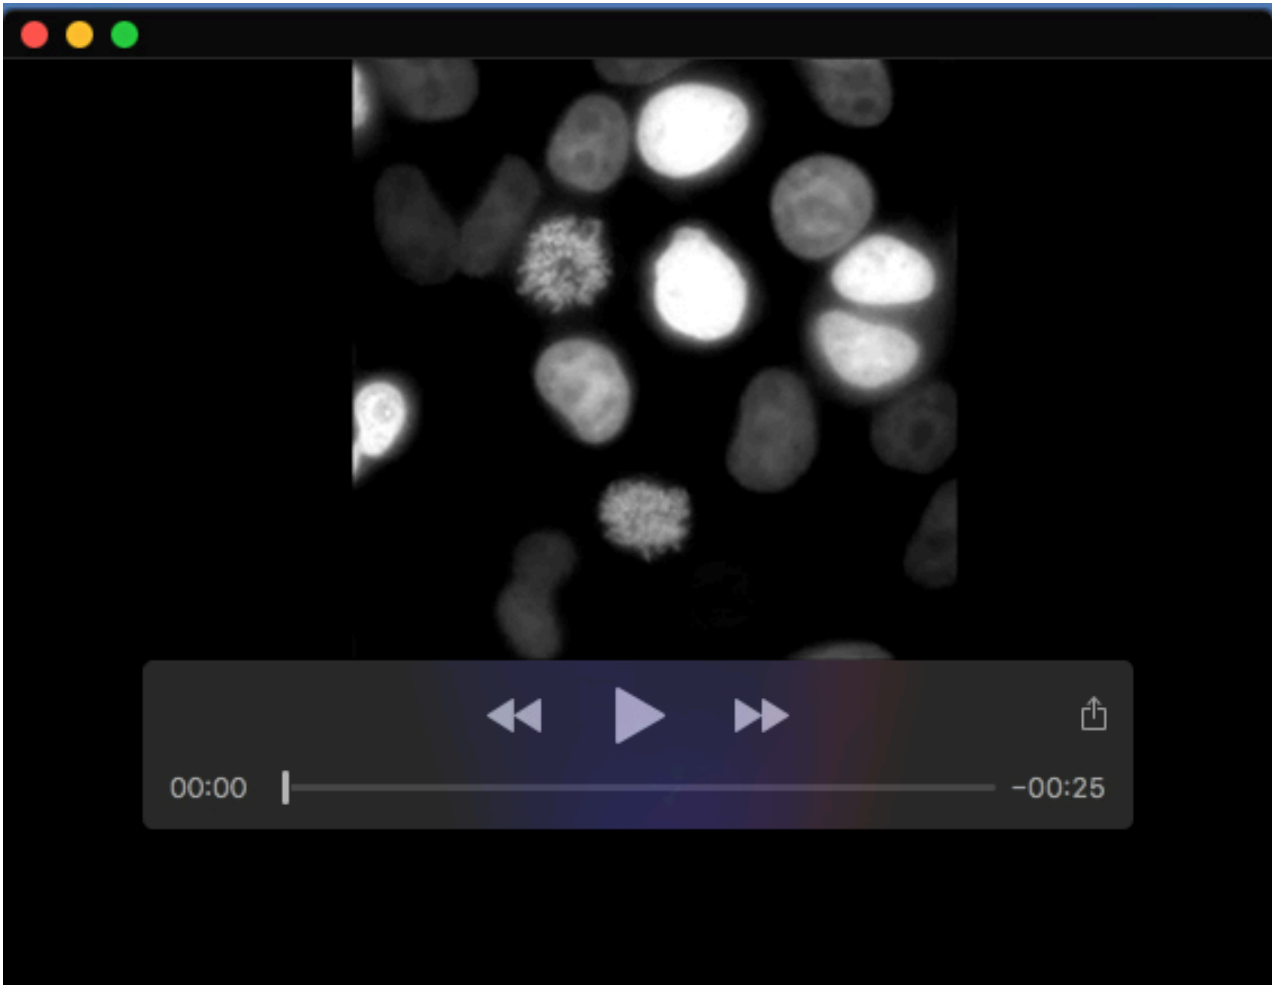

**Movie 5.** Epifluorescent images taken every 5 minutes of HeLa mCherry H2B GFP tubulin cells after DTB and transfected with siMKLP2 + pCS2 TAP KIF20A E413A. Images were compiled into a time-lapse movie of SME projections.
